# Effect of Changing Heart Rate on the Ocular Pulse and Dynamic Biomechanical Behavior of the Optic Nerve Head

Yuejiao Jin<sup>\*1,2</sup>, Xiaofei Wang<sup>\*3</sup>, Sylvi Febriana Rachmawati Irradiastputri<sup>2</sup>, Rosmin Elsa Mohan<sup>2,4</sup>, Tin Aung<sup>4,6</sup>, Shamira A. Perera<sup>4,5</sup>, Craig Boote<sup>2,10</sup>, Jost B. Jonas<sup>11</sup>, Leopold Schmetterer<sup>4,5,7-9</sup>, Michaël J.A. Girard<sup>2,4</sup>

1. NUS Graduate School for Integrative Sciences and Engineering, National University of Singapore, Singapore
2. Department of Biomedical Engineering, National University of Singapore, Singapore
3. Beijing Advanced Innovation Center for Biomedical Engineering, School of Biological Science and Medical Engineering, Beihang University, Beijing, China
4. Singapore Eye Research Institute, Singapore National Eye Centre, Singapore
5. Duke-NUS Medical School, Singapore
6. Department of Ophthalmology, Yong Loo Lin School of Medicine, National University of Singapore, Singapore
7. Lee Kong Chian School of Medicine, Nanyang Technological University, Singapore
8. Department of Clinical Pharmacology, Medical University of Vienna, Austria
9. Center for Medical Physics and Biomedical Engineering, Medical University of Vienna, Austria
10. School of Optometry & Vision Sciences, Cardiff University, UK.
11. Department of Ophthalmology Medical Faculty Mannheim, Heidelberg University, Mannheim, Germany

\*YJ and XW contributed equally

**Support:** Singapore Ministry of Education, Academic Research Fund, Tier 2 (R-397-000-280-112).

**Commercial relationship:** None

**Word count:** 4798 (Manuscript Text)

**Tables:** 1

**Figures:** 9

**Corresponding Author:** Michaël J. A. Girard, Ph.D.  
National University of Singapore  
Engineering Block 4, #04-8  
4 Engineering Drive 3  
Singapore 117583  
[mgirard@nus.edu.sg](mailto:mgirard@nus.edu.sg)  
+65 6516 5549  
<http://www.bioeng.nus.edu.sg/OEIL/>

53 **ABSTRACT**

54 **Purpose:** To study the effect of changing heart rate on the ocular pulse and the  
55 dynamic biomechanical behaviour of the optic nerve head (ONH) using a  
56 comprehensive mathematical model.

57

58 **Methods:** In a finite element model of a healthy eye, a biphasic choroid consisted of  
59 a solid phase with connective tissues and a fluid phase with blood, and the lamina  
60 cribrosa (LC) was viscoelastic as characterized by a stress-relaxation test. We  
61 applied arterial pressures at 18 ocular entry sites (posterior ciliary arteries) and  
62 venous pressures at four exit sites (vortex veins). In the model, the heart rate was  
63 varied from 60 bpm to 120 bpm (increment: 20 bpm). We assessed the ocular pulse  
64 amplitude (OPA), pulse volume, ONH deformations and the dynamic modulus of the  
65 LC at different heart rates.

66

67 **Results:** With an increasing heart rate, the OPA decreased by 0.04 mmHg for every  
68 10 bpm increase in heart rate. The ocular pulse volume decreased linearly by  
69 0.13  $\mu\text{L}$  for every 10 bpm increase in heart rate. The storage modulus and the loss  
70 modulus of the LC increased by 0.014 MPa and 0.04 MPa, respectively, for every 10  
71 bpm increase in heart rate.

72

73 **Conclusions:** In our model, the OPA, pulse volume, and ONH deformations  
74 decreased with an increasing heart rate, while the LC became stiffer. The effects of  
75 blood pressure / heart rate changes on ONH stiffening may be of interest for  
76 glaucoma pathology.

77

78

79

80

81

82

83

84

85

86

87

88

## 89 INTRODUCTION

90 Glaucoma is a complex, multifactorial disease. Although the pathogenic mechanism  
91 of glaucoma has still not been well understood, it has generally been accepted that  
92 various interlinked biomechanical and vascular pathways to glaucomatous injury are  
93 involved, and that these are closely related to the optic nerve head (ONH)  
94 biomechanics.<sup>1-8</sup> The ONH, and in particular the lamina cribrosa (LC), is a primary  
95 site of interest during the development of glaucoma since it is the region where  
96 retinal ganglion cell (RGC) axon damage occurs. Because the ONH is constantly  
97 exposed to several loads in vivo (e.g. IOP, cerebrospinal fluid pressure (CSFP),  
98 orbital fat pressure, optic nerve traction),<sup>6, 9-13</sup> there is a general consensus that  
99 knowing how 'robust' a ONH is could be a critical information for estimating the risk  
100 of developing glaucoma.

101 To date, to assess the biomechanics of the ONH in vivo, the typical approach  
102 has been to artificially manipulate IOP (e.g. with ophthalmodynamometry) while  
103 observing the resulting deformations with optical coherence tomography (OCT).<sup>14-17</sup>  
104 While such methods may have value from a research point of view, they may not be  
105 easily translated clinically due to discomfort during the examination of the patients.  
106 However, IOP is not constant but rather pulsatile, fluctuating constantly with the  
107 cardiac cycle. The fluctuation of IOP with the heart rate has been known as the  
108 ocular pulse and the difference between the systolic and diastolic IOP has been  
109 termed the ocular pulse amplitude (OPA). In a previous study, we proposed a  
110 framework to assess ONH biomechanics in vivo without artificially manipulating IOP.  
111 ONH deformations can indeed be measured by using the ocular pulse as the load,<sup>18</sup>  
112 and from such data, modelling can help us interpret these deformation data to derive  
113 stiffness estimates for the ONH.<sup>19</sup>

114 This is however a complex engineering problem: the ONH tissues are  
115 viscoelastic,<sup>7, 20, 21</sup> which basically means that ONH stiffness is affected by the rate  
116 of loading, or in other words, the duration of the cardiac cycle. Indeed, collagenous  
117 soft tissues typically appear stiffer when they are loaded faster. This is a protective  
118 mechanism for soft tissues to handle highly dynamic events.<sup>7, 20</sup> Furthermore, it has  
119 been shown clinically, that an increase in heart rate or a change in blood pressure  
120 can also affect the OPA;<sup>22, 23</sup> this will in turn affect the deformations of the ONH.

121 To measure the stiffness of the ONH using the ocular pulse as a natural load,  
122 we believe it is critical to first build an understanding of how the heart rate and blood  
123 pressure change the IOP (i.e. the OPA), and how they also affect the stiffness and  
124 deformations of the ONH tissues. From a clinical point of view, if ONH tissues  
125 appear stiffer, a physician should be able to tell whether this is because of a different  
126 heart rate / blood pressure, or because of tissue remodelling from glaucoma. In this  
127 study, we aim to build such an understanding using finite element (FE) modelling. In  
128 the future, our proposed models could be combined with experimental data to  
129 assess ONH stiffness in vivo.

130

131

## 132 **METHODS**

133 Using FE modelling, we previously modelled the origin of the ocular pulse and its  
134 effect on the ONH.<sup>19</sup> We found that a change in arterial pressure (as that occurring  
135 from diastole to systole) resulted in choroidal swelling, which in turn induced a  
136 change in IOP (the OPA) due to the incompressibility of the vitreous. Both the OPA  
137 and choroidal swelling were responsible for deforming the ONH tissues, and a  
138 relatively large shearing of neural tissues was observed within the neuroretinal rim.  
139 The vast majority of the trends we reported matched clinical and experimental data.

140 In this study, we used the same model, but we further defined the LC as a  
141 viscoelastic material. Such viscoelastic properties were obtained experimentally  
142 using uniaxial stress relaxation tests. Using our FE model, we then varied the heart  
143 rate from 60 bpm to 120 bpm and studied its effect on: 1) the OPA, 2) the choroidal  
144 pulse volume, 3) ONH deformations, and 4) LC stiffness.

145

### 146 **Three-Dimensional Geometry of the Ocular and Orbital Tissues**

147 The geometry of the three-dimensional eye model was adapted from our previous  
148 studies.<sup>12, 19, 24</sup> In summary, the eye globe and optic nerve were reconstructed from  
149 magnetic resonance imaging images of a healthy subject. The corneoscleral shell  
150 was assumed to be spherical with an outer diameter of 24 mm and thickness of 1  
151 mm. The optic nerve was composed of three tissues: the nerve tissue, the pia mater  
152 and the dura mater. A generic ONH geometry was constructed and embedded within  
153 the corneoscleral shell, including the scleral flange, Bruch's membrane, the LC, the  
154 prelaminar tissue and the border tissue of Elschnig and Jacoby as extensions of the

155 pia mater. The model was then meshed using 67,584 eight-node hexahedrons and  
156 3,024 six-node pentahedrons (Figure 1). The mesh density was numerically  
157 validated through a convergence test. The whole eye was reconstructed, and  
158 symmetry conditions were not applied.

159

### 160 **Biomechanical Properties of the Ocular Tissues**

161 The sclera was modelled as a fiber-reinforced composite, as described in our  
162 previous paper.<sup>25</sup> The neural tissues and Bruch's membrane were modelled as  
163 isotropic elastic materials.<sup>26</sup> The pia and dura were modelled as Yeoh materials, as  
164 characterized from experiments with porcine eyes.<sup>24</sup> As performed in our previous  
165 study, we modelled the choroid as a biphasic material comprising a solid phase and  
166 a fluid phase (i.e. blood) to allow for changes in blood pressure during the cardiac  
167 cycle and the movement of blood within the choroid.<sup>19</sup> All biomechanical parameters  
168 are listed in **Table 1**.

169

### 170 **Viscoelastic Properties of the Lamina Cribrosa**

171 In order to characterize the response of the LC under dynamic loading such as the  
172 heart rate, we studied its viscoelastic properties. Since the viscoelasticity properties  
173 of the LC have not been reported in the literature yet, we conducted uniaxial stress  
174 relaxation tests of the LC of seven porcine eyes.

175 Experiments were performed in accordance to the ARVO (Association for  
176 Research in Vision and Ophthalmology) statement for the Use of Animals in  
177 Ophthalmic and Vision Research. The experimental procedure followed the  
178 previously described methodology designed for the sclera.<sup>27, 28</sup> In brief, seven fresh  
179 porcine eyes were collected and cleaned of all extraorbital tissues. After dissecting  
180 the eye and cutting the optic nerve, the retina and choroidal layers were removed. A  
181 customized device was used to cut a scleral strip (orientation: inferior to superior)  
182 with the LC in its center (width: 1.2 mm; Figure 2). Mineral oil was applied to the  
183 specimen surface to maintain hydration. Each sample was mounted between the two  
184 grips of the uniaxial tensile tester (Instron 5848; Instron. Inc., Norwood, MA, USA)  
185 with the LC exposed in the center (Figure 2c). The sample was subjected to 10  
186 cycles of preconditioning at 1% strain prior to the stress relaxation test. The sample  
187 was then subjected to a maximum of 5% strain at a rate of 1% per second, followed  
188 by a relaxation period of 300s at constant stress. These strain levels were chosen as

189 they are typically exhibited in vivo under physiological conditions (during eye  
190 movements or change in IOP).<sup>10</sup> The thickness measurements of the LC (mean:  
191 0.628mm) were obtained by spectral-domain optical coherence tomography  
192 (Spectralis OCT, Heidelberg Engineering, Heidelberg, Germany) and were used to  
193 compute the tensile stress. The averaged stress values of seven porcine eyes were  
194 fitted with a linear viscoelastic model incorporating a reduced relaxation function to  
195 characterize the viscoelastic properties of the LC.<sup>28</sup> A typical stress relaxation curve  
196 is shown in Figure 2d.

197

### 198 **Boundary and Loading conditions**

199 Two sets of boundary conditions were applied to ensure numerical stability. First, the  
200 orbital apex of the optic nerve was fixed to model its connection to the optic canal.  
201 Second, the eye globe was fixed near the equator on two opposite sides with four  
202 nodes on each side. This was carried out to improve stability and to avoid such  
203 boundary conditions from having an impact on the ONH deformations.

204 We applied a baseline IOP of 15 mmHg to the inner limiting membrane and a  
205 baseline CSFP of 11.3 mmHg to the arachnoid space (Figure 3).<sup>29</sup> As described  
206 previously, we applied prescribed fluid pressures on the choroidal layer to mimic the  
207 blood flow inlets (long and short posterior ciliary arteries [PCAs]) and outlets (vortex  
208 veins).<sup>19</sup> The arterial pressure was varied between 70.8 and 93 mmHg to mimic the  
209 diastolic and systolic changes of the ophthalmic artery pressure.<sup>30</sup> A constant blood  
210 pressure of 15 mmHg was applied at the four vortex veins exits out of the choroid.<sup>31</sup>  
211 In our model, it was the pressure difference between the PCAs and vortex veins that  
212 drove the choroidal blood flow, allowing the choroid to swell during the cardiac cycle.

213

### 214 **Changing the Heart Rate from 60 to 120 bpm**

215 We aimed to understand the impact of different heart rates on the ocular pulse, ONH  
216 deformations, and LC stiffness. Hence, four models were implemented with the heart  
217 rate ranging from 60 to 120 bpm with an increment of 20 bpm. All the boundary  
218 conditions and material properties were kept constant, such that only the heart rate  
219 varied.

220

### 221 **FE Processing to Predict the OPA, Pulse Volume, and ONH Deformations**

222 All FE models were solved with FEBIO v2.8.5 (Musculoskeletal Research  
223 laboratories, University of Utah, Salt Lake City, UT, USA).<sup>32</sup> The OPA was estimated  
224 by first assuming that the vitreous was incompressible as performed in our previous  
225 study.<sup>19</sup> This is a reasonable assumption because the vitreous mostly consists of  
226 water, which is also incompressible, and is gas-free. Therefore, the volume of the  
227 vitreous body was constrained to remain constant during choroidal swelling in all our  
228 simulations. Since our model aimed to reproduce choroidal swelling during the  
229 cardiac cycle, such a swelling will try to deform and change the volume of the  
230 vitreous body. Since the vitreous body was constrained as incompressible, an  
231 internal pressure needed to be applied to maintain its volume. This pressure term is  
232 an output of our model and can be understood as the OPA.

233 More specifically, each model was implemented in three steps as shown in  
234 Figure 4. The initial step applied boundary conditions and loads including baseline  
235 IOP, CSFP and ophthalmic arterial pressure and vortex vein pressure. During the  
236 second step, a 5000s relaxation period was applied due to the viscoelasticity of the  
237 LC. All the boundary conditions and loads remained unchanged. During the final step,  
238 we imposed a volume constraint to the inner limiting membrane to ensure the  
239 incompressibility of the vitreous.<sup>19</sup> The CSFP, baseline IOP and vortex vein pressure  
240 were kept constant; the ophthalmic arterial pressure varied from diastole to systole  
241 periodically following a sinusoidal profile for two cycles.

242 The post processing was performed using MATLAB (v2018; Mathworks,  
243 Natick, MA, USA). For each model, we reported the OPA, the pulse volume, the  
244 diastole-to-systole displacements of the LC and of the pre-lamina tissue. In addition,  
245 we characterized the stiffness of the LC at different heart rates in the central region  
246 along the radial, circumferential and longitudinal directions (Figure 5).

247

### 248 **Characterizing LC Stiffness with Changing Heart Rate**

249 The stiffness of the LC can be characterized by computing its dynamic modulus, as  
250 typically performed for dynamic mechanical analyses.<sup>20</sup> Since the ocular pulse  
251 induced a cyclic deformation of the LC, the LC strain 'input' can be represented as:

$$252 \quad \varepsilon = \varepsilon_0 \sin(\omega t + \delta_\varepsilon) \quad (1)$$

253 where  $\varepsilon_0$ ,  $\delta_\varepsilon$ , and  $\omega$  are the peak strain amplitude, strain phase shift and angular  
254 frequency of the harmonic excitation, respectively. Since the LC only exhibits small  
255 strains, the LC can be approximated to be linear viscoelastic.<sup>33</sup> Hence, the resulting



256 sinusoidal stress ‘output’ would differ in phase from the ‘input’ strain depending on  
257 the viscoelastic properties of the LC, and can be expressed as:

$$258 \quad \sigma = \sigma_0 \sin(\omega t + \delta_\sigma) \quad (2)$$

259 where  $\sigma_0$  and  $\delta_\sigma$  are the peak stress amplitude and stress phase shift, respectively.

260 The phase delay between the stress and the strain due to viscoelastic effects is  
261 known as the phase lag  $\delta$ , i.e. the difference between  $\delta_\varepsilon$  and  $\delta_\sigma$  (Figure 6). The  
262 dynamic mechanical properties of the LC can now be represented by the complex  
263 dynamic modulus, consisting of the storage modulus (elastic component) and the  
264 loss modulus (viscous component). It is defined as:

$$265 \quad E^* = \frac{\sigma}{\varepsilon} = E' + iE'' \quad (3)$$

266 where  $E'$  is the storage modulus,  $E''$  is the loss modulus, and  $i$  the unit imaginary  
267 number. The storage and loss moduli are related to the phase lag through the  
268 following equations:

$$269 \quad E' = E * \cos(\delta), \quad (4a)$$

$$270 \quad E'' = E * \sin(\delta) \quad (4b)$$

271

272 For each heart rate, we computed the storage and loss moduli in the central  
273 region of the LC (composed of one element). We first computed the Lagrange strain  
274 and Cauchy stress tensors, and estimated the diastole-to-systole Lagrange strain  
275 and Cauchy stress profiles along three directions (radial, circumferential, and  
276 longitudinal). Each strain/stress profile was then fitted with equations (1-2) to  
277 determine the peak strain/stress amplitudes and the phase shifts. From these data  
278 we extracted the phase lag, and thus the storage and loss moduli of the LC central  
279 region along 3 directions: radial, circumferential, and longitudinal.

280

## 281 **RESULTS**

282

### 283 **Effect of the Heart Rate on the Ocular Pulse**

284 For each model, the pulsating arterial pressure during the cardiac cycle  
285 resulted in choroidal swelling (increase in pulse volume), which in turn increased the  
286 IOP (the delta change in IOP being the OPA). The IOP and the pulse volume as  
287 functions of time are shown in Figure 7 for two cycles at a heart rate of 60 bpm.



288 We also found that both the OPA and the pulse volume decreased with an  
289 increasing heart rate (Figure 7). On average, the OPA and the pulse volume  
290 decreased by 0.04 mmHg (2.7%) and 0.13 $\mu$ L (2.8%), respectively for every 10 bpm  
291 heart rate increment.

292

293

#### 294 **Effect of the Heart Rate on ONH Deformations**

295 During the cardiac cycle, the ONH moved posteriorly (diastole-to-systole) and  
296 anteriorly (systole-to-diastole). The diastole-to-systole displacement of the central  
297 anterior LC point was 5.8  $\mu$ m at a heart rate of 60 bpm and decreased by 0.1  $\mu$ m for  
298 every 10 bpm heart rate increment (Figure 8a-c).

299 We also observed that the prelamina (neural tissue anterior to the lamina) and  
300 the parapapillary retina moved along opposite directions during the cardiac cycle.  
301 Specifically, from diastole to systole, the prelamina moved posteriorly (as highlighted  
302 in red in Figure 8d), whereas the parapapillary retina (highlighted in black in Figure  
303 8d) moved anteriorly. This resulted in a net shearing of the neural tissues in the  
304 neuro-retinal rim. This shearing amount (difference between the prelamina  
305 displacement and the parapapillary retina displacement) also decreased with an  
306 increasing heart rate. On average, the shearing amount reduced by 0.12  $\mu$ m for  
307 every 10 bpm heart rate increment (Figure 8f).

308

#### 309 **Effect of the Heart Rate on LC stiffness**

310 The storage and loss moduli were computed in the central region of the LC for  
311 3 orientations (radial, circumferential, and longitudinal). They all followed the exact  
312 same trend and all increased with an increasing heart rate. On average, the storage  
313 modulus increased by 0.014 MPa, and the loss modulus by 0.04 MPa, for every 10  
314 bpm heart rate increment. This indicates that the lamina cribrosa will appear stiffer  
315 with a higher heart rate.

316

317

318

319

320

321

322

## 323 **DISCUSSION**

324 In this study, we used FE modelling to study the impact of the heart rate on the  
325 ocular pulse and its biomechanical impact on the ONH. Our model predicted that the  
326 OPA, pulse volume and ONH deformations decreased with an increasing heart rate.  
327 In addition, the LC became stiffer at faster heart rates. These findings may help  
328 develop technologies to finely assess the biomechanical properties of the ONH in  
329 vivo.

330

### 331 **The OPA and the Pulse Volume Decreased with an Increasing Heart Rate**

332 With an increase in heart rate, both the OPA and the pulse volume reduced when  
333 simultaneously the ophthalmic arterial and venous vein pressures were kept  
334 constant. A faster heart rate is associated with a shorter duration for each cardiac  
335 cycle, suggesting that the volume of blood being pushed into the choroid would be  
336 reduced for each pulse. Our results are also consistent with a previous clinical  
337 study,<sup>23</sup> in which all the subjects were fitted with cardiac pacemakers and the heart  
338 rate was altered by resetting the pacemakers. Neither IOP nor systolic-diastolic  
339 blood pressures were found to be significantly altered during the experiments,  
340 suggesting that the heart rate was one of the main contributing factor causing a  
341 reduction in OPA.

342 It has also been observed that a short period of dynamic exercise can also  
343 lead to a reduction in OPA and ocular pulse volume.<sup>34-36</sup> However, the impact of  
344 exercise is complex as it involves changes in multiple physical parameters including  
345 not only the IOP and heart rate, but also the systolic and diastolic blood pressures,  
346 and blood distribution in the body. Although heart rate and blood pressures involve  
347 separate mechanisms, exercises would induce an increase in both heart rate and  
348 blood pressures.<sup>37</sup> The systolic and diastolic blood pressures are related to the  
349 ocular pulse through the ocular perfusion pressure (OPP), defined as the difference  
350 between the mean blood pressure and IOP. In one study, there was a significant  
351 reduction in IOP, and an increase in OPP immediately after strenuous exercise  
352 (resting: heart rate=  $68 \pm 7.9$  bpm, IOP=  $19.8 \pm 5.4$  mmHg, OPP =  $51.2 \pm 4.9$  mmHg;  
353 after exercise: heart rate=  $125 \pm 24.9$  bpm, IOP=  $14.3 \pm 5.0$  mmHg, OPP=  $56.9 \pm 7.5$

354 mmHg).<sup>36</sup> Our models could potentially be used to reproduce more complex  
355 scenarios such as those.

356

### 357 **ONH deformations and Neural Tissue Shear Decreased with an Increasing**

#### 358 **Heart Rate**

359 Our model predicted that ONH deformations decreased with an increasing heart rate.  
360 It has been shown that isometric exercise caused a significant increase in the mean  
361 arterial blood pressure and pulse rate, and decreased the fundus pulsation amplitude,  
362 as measured by laser interferometry.<sup>22</sup> Despite changes in the mean arterial blood  
363 pressure, reduced fundus pulsation amplitude may indicate a decrease in ONH  
364 deformations at a faster heart rate, which is consistent with our predicted results.

365 From diastole to systole, the shearing amount refers to the anterior movement  
366 of the parapapillary retina due to the choroidal expansion and the posterior ONH  
367 deformation due to both choroidal swelling and the OPA. With an increase in heart  
368 rate, it is expected that the shearing amount would decrease due to the reduced  
369 OPA and pulse volume. This shearing phenomenon has been observed in-vivo in  
370 humans using low-coherence tissue interferometry.<sup>18</sup>

371

#### 372 **The LC Became Stiffer with an Increasing Heart Rate**

373 Our model predicted that the dynamic modulus of LC increased with an increasing  
374 heart rate. Similar phenomena have also been observed in other viscoelastic  
375 biological tissues such as the cornea<sup>38, 39</sup> intervertebral discs,<sup>40</sup> and other  
376 biomaterials.<sup>41</sup> The dynamic modulus characterizes the stiffness of a material in  
377 response to dynamic loading, and it can differ from its static behaviour since  
378 viscoelastic materials typically become more rigid with a faster loading rate.<sup>38, 39</sup> The  
379 static modulus describes the elasticity of a tissue at 'equilibrium', whereas the  
380 dynamic modulus provides information about the instant stiffness of a material. For  
381 instance, for the cornea, the dynamic properties are likely dominated by the  
382 rearrangement of the extracellular matrix (mainly through diffusion of water) upon  
383 changes in stress, whereas the static properties are more closely related to the  
384 collagen structure.<sup>42</sup> Histological studies have shown that the morphology of the LC,  
385 as a porous, reticulated and multi-lamellar sieve-like structure, mainly comprises of  
386 laminar beams consisting of elastin fibres and collagen fibrils (type I and III).<sup>43</sup> Hence,  
387 it is likely that the dynamic and static responses of the LC are also dominated by

388 different components, and both may change differently during the progression and  
389 development of glaucoma.

390

### 391 **Clinical Relevance to Glaucoma Pathogenesis**

392 At first view, a faster heart rate may be beneficial for the eye. First, it resulted in a  
393 smaller OPA and hence smaller ONH deformations. A larger deformation would yield  
394 larger stain/stress fluctuations within the LC, which may have an impact on the  
395 retinal ganglion cell axons and the vascular capillaries. This is also consistent with  
396 the fact that a larger OPA has been observed in chronic angle-closure glaucoma and  
397 suspected open-angle glaucoma subjects.<sup>44</sup>

398 Second, a faster heart rate also resulted in lower neural tissue shear, which  
399 may limit axonal damage in the neuroretinal rim region.<sup>45-47</sup> As discussed in our  
400 previous work, repeated shearing of axons in the neuroretinal rim region could  
401 potentially contribute to axonal damage. The neuroretinal rim is indeed a region that  
402 exhibits a mechanical discontinuity: it is where RGC axons follow a sharp turn to  
403 enter the disc. In this region, a reduction in Bruch's-membrane-opening minimum-  
404 rim-width (BMO-MRW) has been observed clinically in glaucoma and in elderly  
405 individuals.<sup>45-50</sup> Hence, decreasing shearing with a faster heart rate may be seen as  
406 'mechanically protective'.

407 Third, the LC was found to stiffen with an increasing heart rate, which could  
408 provide better support to the RGCs and vasculatures. Pseudoexfoliation (PEX)  
409 syndrome is a systemic disorder of the elastic fiber system which can lead to PEX  
410 glaucoma. It has been reported that the stiffness of the LC in PEX eyes is 40% less  
411 than that in normal eyes as evaluated by atomic force microscopy.<sup>51</sup> This decrease  
412 in LC stiffness may increase susceptibility to IOP-induced glaucomatous optic nerve  
413 damage as observed in PEX eyes, and thus, dynamic stiffening of the LC may also  
414 be seen as beneficial.

415 However, the situation may be more complex as the effects of dynamic  
416 loading at the cellular level has remained elusive yet. The response of cells to  
417 deformation is dependent on both the magnitude and the rate of mechanical strain.  
418 Some studies have shown that short-term strain or stress variations can lead to  
419 cellular injury in neurons and neuron-like cells.<sup>52-54</sup> Future research is required to  
420 better understand the link between dynamic loading and RGC axonal injury at the  
421 micro or cellular scale.

422

### 423 **Understanding The Clinical Implications of LC Stiffening**

424 During the development and progression of glaucoma, the connective tissues of the  
425 ONH undergo constant remodelling (including stiffening in the moderate/severe  
426 stages) and extensive structural changes.<sup>55</sup> The extracellular matrix remodelling are  
427 usually characterized by fibrotic changes associated with cellular and molecular  
428 events such as myofibroblast activation that could drive further tissue fibrosis and  
429 stiffening.<sup>56</sup> However, as discussed herein, the LC also gets stiffer with an increased  
430 heart rate. Ex vivo strain measurement shows that the stiffness of the LC increases  
431 with age.<sup>57</sup> It is believed that the change in LC stiffness due to the change in heart  
432 rate and aging involves different mechanisms. Our results only reflect the short-term  
433 impact of a raised heart rate and we do not know whether the stiffening of the lamina  
434 will become chronic or whether other homeostatic mechanisms might reverse these  
435 changes in the longer term. If an increase in dynamic LC stiffness is proved to be  
436 beneficial, it is possible to modulate heart rate in the longer term via pharmacological  
437 means. Finally, it is important to note that, while assessing the material properties of  
438 the LC from the ocular pulse, physicians should be able to distinguish whether a  
439 change in LC stiffness is because of a different heart rate/blood pressure, or  
440 because of tissue remodelling. This information may be helpful to predict glaucoma  
441 progression.

### 442 **Limitations**

443 Our study has several limitations. First, our model did not consider the regional  
444 variations in the scleral thickness and stiffness, which are known to exist in monkeys,  
445 canines, and humans.<sup>20, 58, 59</sup> The regional variations may affect the prediction of the  
446 OPA.

447 Second, the choroid was simplified and modelled as a biphasic material,  
448 consisting of a porous solid phase (connective tissues) and a fluid phase (blood). In  
449 addition, the permeability of the choroid was approximated grossly from the vascular  
450 resistance, the average diameter of the choroid and the blood viscosity.<sup>19</sup> The  
451 complex microvasculature architecture, as well as the blood flow of the choroid,  
452 cannot be fully captured by this description. For instance, the segmental distribution  
453 of PCAs<sup>60</sup> and the autoregulatory capacity of the choroid<sup>22, 61</sup> were not taken into  
454 account in our model. Furthermore, the PCAs and vortex veins were not modelled  
455 explicitly but represented by prescribed fluid pressures. Future work may need to

456 assess the permeability of the choroid experimentally and also consider more  
457 complex material models to better describe the behaviour of the pulsatile choroidal  
458 blood flow.

459 Third, our model did not account for the blood circulation within the LC and  
460 other pulsatile components including those from the retina, central retinal artery and  
461 the CSFP. These pulsations may affect the LC deformations as well. The pulsation  
462 of the CSFP is phase-shifted with respect to the ocular pulse, such that the CSFP  
463 peak occurs slightly before that of the IOP.<sup>62, 63</sup> The phase difference between the  
464 IOP and CSFP may lead to dynamic fluctuations of the translaminal pressure  
465 gradient, resulting in different ONH deformation profiles. The contribution of these  
466 pulsatile components may be important and should be considered in future studies.

467 Fourth, the geometry of the eye was constructed from a single eye model and  
468 the dimensions of the ONH were taken as average measurements from the literature.  
469 However, the ocular and ONH geometries can vary widely across individuals and  
470 thus may influence the predicted ocular pulse significantly. In our model, the retina,  
471 choroid and BM were simplified as a uniform layer throughout the eye. We aim to  
472 take regional variations in tissue thickness into consideration in future work.

473 Fifth, we experimentally measured the viscoelastic material properties of the  
474 porcine LC in this study. It is possible that the LC exhibits different viscoelastic  
475 properties across species. In addition, the LC was simplified as an isotropic and  
476 homogeneous material; the complicated laminar microarchitecture was not taken into  
477 account. Micro-level modelling of the laminar beams predicted higher strain and  
478 stress than those predicted by macro-scale models of the ONH.<sup>64</sup> The mean strain of  
479 the laminar beams varies greatly across different nonhuman primates and depends  
480 on the 3D geometry of each eye's ONH connective tissues.<sup>64, 65</sup> Models  
481 incorporating the micro-level laminar beams may be considered in the future.

482 Sixth, for simplicity and as a first approach, we only modelled the  
483 viscoelasticity of the LC and not that of other tissues such as the choroid and the  
484 sclera. We focused on the LC only as it is a tissue that has been observed under  
485 dynamic loading<sup>18</sup> and because it plays a critical role in glaucoma as the main site of  
486 damage. More complex models will be needed in the future to better understand how  
487 scleral and choroidal viscoelasticity could interact with the LC.

488 Seventh, the results shown only reflect the short-term impact of a raised heart  
489 rate and we do not know whether the stiffening of the lamina will become chronic or

490 whether other homeostatic mechanisms might reverse these changes in the longer  
491 term.

492 Eighth, the LC was modelled as a uniform structure. We did not take into  
493 account potential differences in the anatomy and biomechanical properties of the  
494 various layers of the LC, nor did we consider lateral movements of the LC in  
495 dependence of changes of the examined parameters and in dependence of the  
496 obliqueness of the optic nerve canal and the spatial relationship between Bruch's  
497 membrane opening and the lamina cribrosa position.<sup>66, 67</sup>

#### 498 **Conclusions**

499 In this study, we used FE modelling to study the ocular pulse and the impact of the  
500 heart rate on ONH deformations. We found that the OPA, the pulse volume the ONH  
501 deformation reduce at a faster heart rate. Our models also indicated that the LC  
502 becomes stiffer with increasing heart rate. These results will help us develop  
503 technology to assess the biomechanics of the ONH in vivo by using the ocular pulse  
504 as a natural load.

505

506

507

508

509

510

511

512

513

514

515

516

517

518

519

520

521

522

523

524

525

526

527

528

529

530

531



532  
533  
534  
535  
536  
537  
538  
539  
540  
541  
542  
543  
544  
545

## Figures and Tables

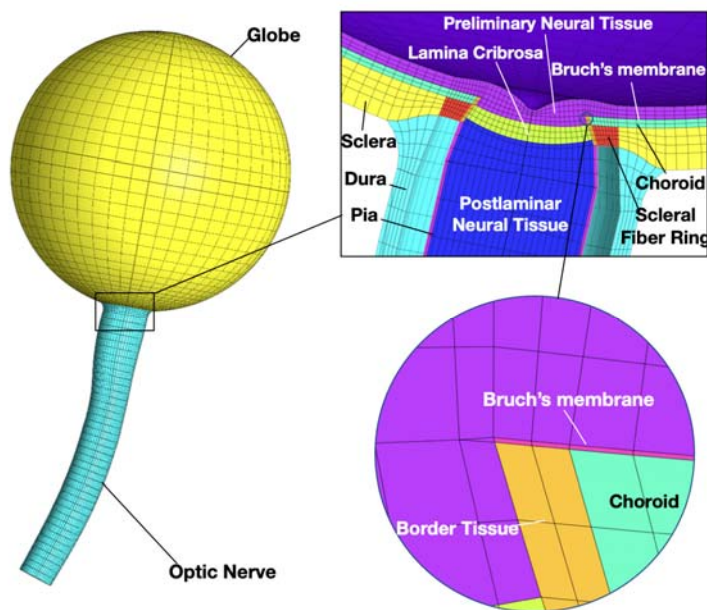

546  
547 **Figure 1.** Reconstructed geometry and FE mesh of the whole eye model adopted  
548 from Jin.<sup>19</sup> ONH structures (including the LC, sclera, neural tissues, choroid, BM,  
549 border tissue, pia and dura) were reconstructed using average measurements from  
550 the literature.<sup>9, 19, 24, 26, 68</sup>

551  
552  
553  
554  
555  
556

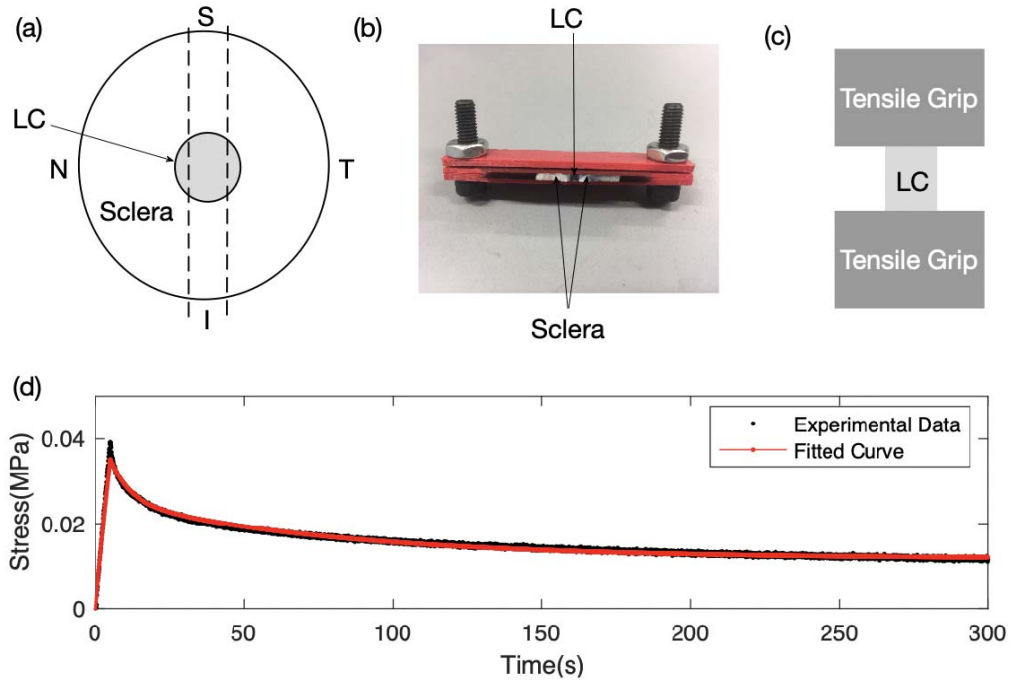

557  
558  
559  
560  
561  
562  
563  
564

**Figure 2.** (a) Schematic showing the scleral strip with the LC in its center. The uniaxial tensile specimen was obtained by using a customized device (shown in b) to obtain a fixed width of 1.2 mm. It was then clamped between the tensile grips (shown in c) with the LC exposed in its centre. (d) A typical stress relaxation experimental test dataset for an LC sample fitted with a linear viscoelastic model curve.<sup>28</sup>

565

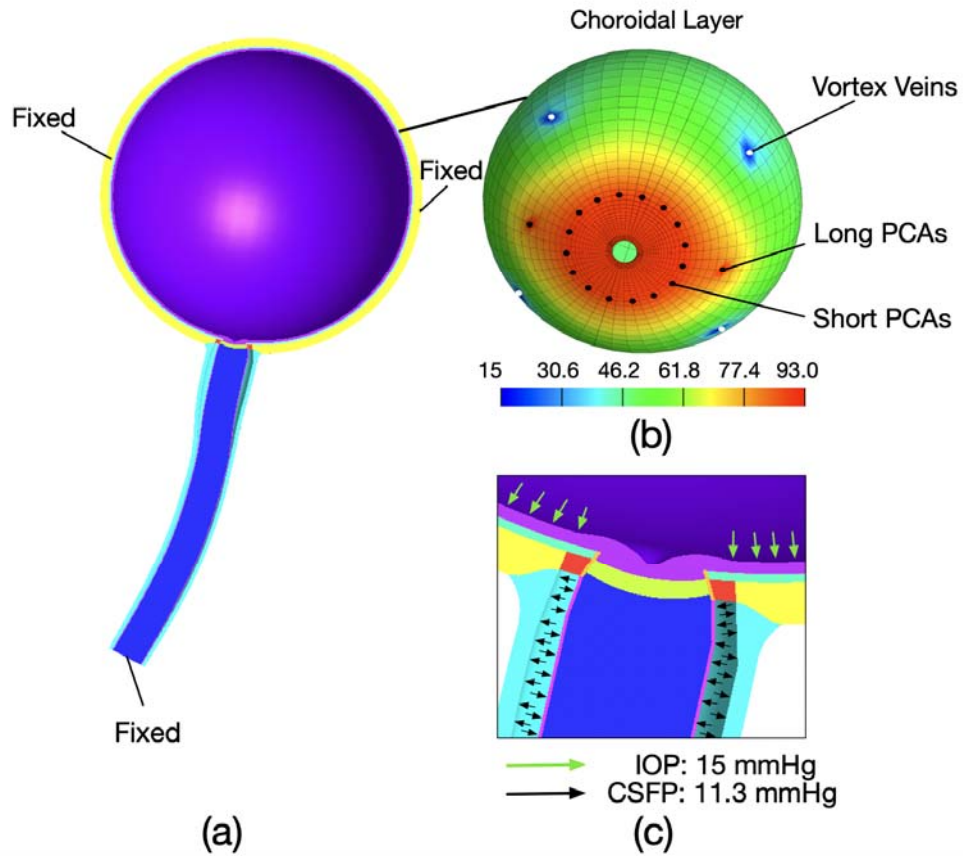

566  
567

568 **Figure 3:** (a) Half eye geometry and boundary conditions: fixed optic nerve at the  
569 orbital apex and fixed sclera nodes near the equator on two opposite sides. (b)  
570 Choroidal with the nodes where arterial blood pressure (short and long PCAs) and  
571 venous blood pressures (vortex veins) were applied. (c) ONH region illustrating the  
572 pressure loads (IOP, CSFP) applied in each model.

573

574  
575

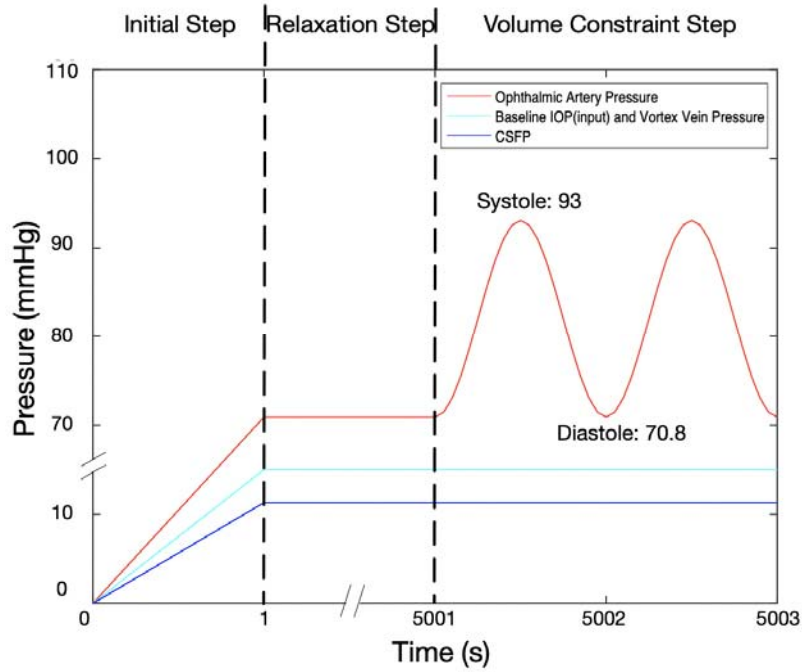

576  
577  
578  
579  
580  
581  
582  
583  
584  
585  
586  
587  
588  
589  
590  
591  
592  
593  
594  
595  
596  
597  
598  
599  
600

**Figure 4.** Profiles of different pressure loads.

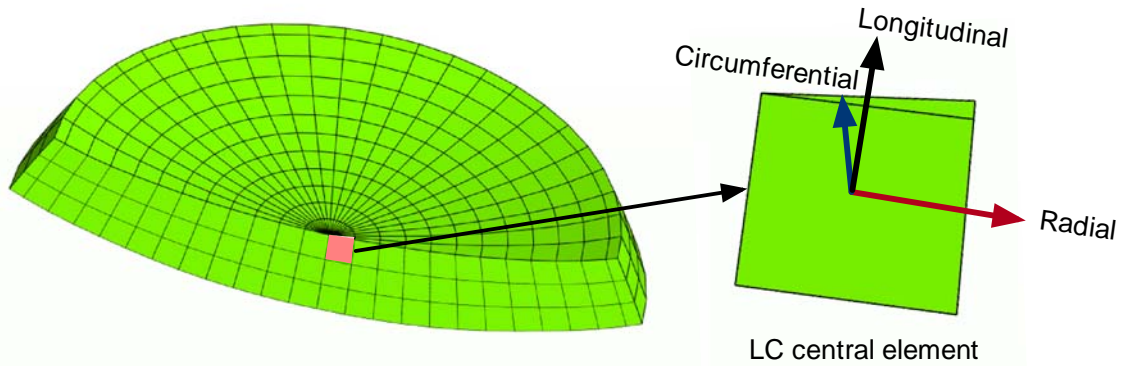

601  
602  
603  
604  
605  
606

**Figure 5:** Cross-section of the LC illustrating the local coordinates (radial, circumferential and longitudinal) for one central element.

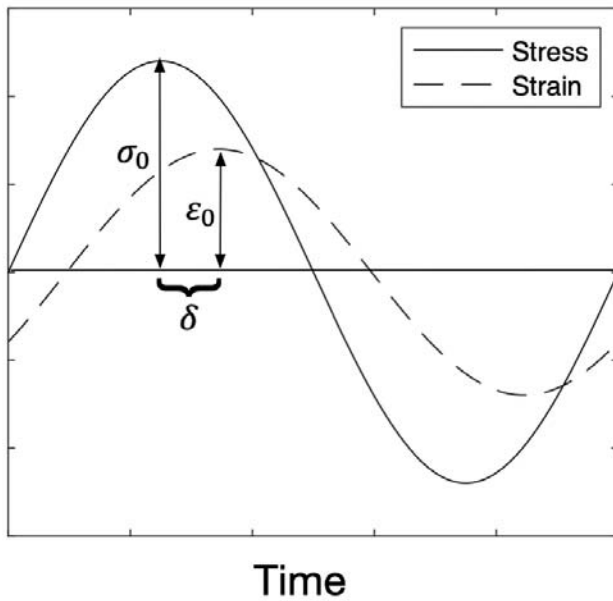

607  
608  
609  
610  
611

**Figure 6.** Schematic representation of the strain and stress profiles as a function of time in calculating the dynamic properties of the LC.

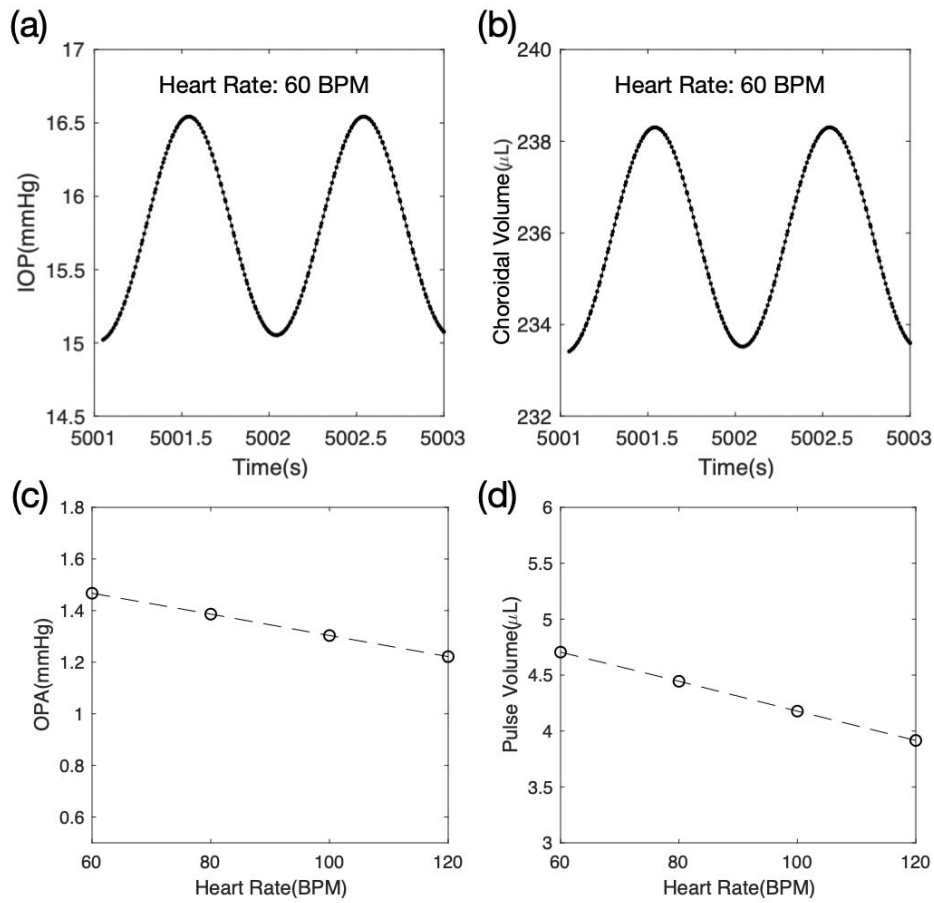

612  
613  
614  
615  
616  
617  
618  
619  
620  
621

**Figure 7.** (a,b) IOP and choroidal volume over two cycles at a heart rate of 60 BPM. (c,d) Change of the OPA and the pulse volume (PV) with heart rate.

### LC displacement and shearing amount

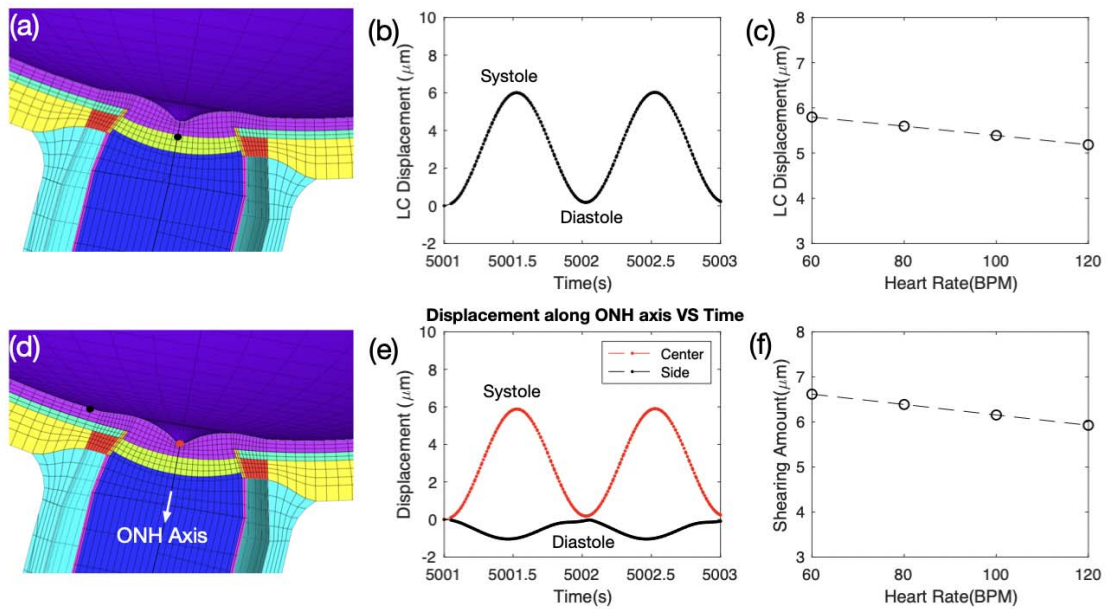

622

623

624

625

626

627

628

629

630

631

632

633

634

635

636

637

638

639

640

641

642

643

644

645

**Figure 8.** (a) Cross-section of the ONH highlighting the center of the LC and (b) the displacement of the LC center. (c) Change of the LC displacement with increasing heart rate. (d,e) Cross-section of the ONH and the radial displacement of the highlighted points (red: center of prelaminar; black: a point on the retinal surface located 0.65 mm away from BMO) over two cardiac cycles. (f) Change of the shearing amount with heart rate.



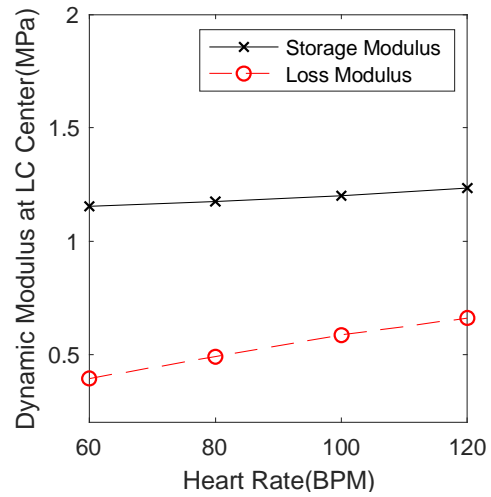

646

647

648

**Figure 9.** Change of the storage and loss moduli of the LC center with the heart rate.

649

650

651

652

653

654

655

656

657

658

659

660 **TABLES**

661 **Table 1.** Tissue biomechanical properties used for all models

| Tissue        | Constitutive Model                                | Biomechanical Properties                                                                                                                                                           | References                             |
|---------------|---------------------------------------------------|------------------------------------------------------------------------------------------------------------------------------------------------------------------------------------|----------------------------------------|
| Sclera        | Mooney-Rivlin Von Mises<br><br>distributed fibers | c1 = 0.285 MPa<br><br>c3 = 0.0137 MPa<br><br>c4 = 658.125<br><br>kf = 2 (scleral ring)<br><br>kf = 0 (other region of sclera)<br><br>$\theta_p$ : preferred fiber orientation      | Girard et al. <sup>25</sup>            |
| LC            | Viscoelastic                                      | Instantaneous modulus = 8.49 MPa<br><br>Equilibrium modulus = 0.49 MPa<br><br>Long-term time constant = 272 s<br><br>Short-term time constant = 8.33 s                             | Porcine tissue experiment (this study) |
| Neural tissue | Isotropic elastic                                 | Elastic modulus = 0.03 MPa<br><br>Poisson's ratio = 0.49                                                                                                                           | Miller <sup>69</sup>                   |
| BM            | Isotropic elastic                                 | Elastic modulus = 10.79 MPa<br><br>Poisson's ratio = 0.49                                                                                                                          | Chan et al. <sup>70</sup>              |
| Choroid       | Biphasic                                          | solid volume fraction: 0.55<br><br>Solid matrix:<br><br>Neo-Hookean<br><br>Elastic modulus = 0.06 MPa<br><br>Poisson's ratio = 0<br><br>Permeability: 45037 mm <sup>2</sup> /MPa.s | Jin et al. <sup>19</sup>               |
| Dura          | Yeoh model                                        | C1 = 0.1707 MPa<br><br>C2 = 4.2109 MPa<br><br>C3 = -4.9742 MPa                                                                                                                     | Wang et al. <sup>24</sup>              |
| Pia           | Yeoh model                                        | C1 = 0.1707 MPa<br><br>C2 = 4.2109 MPa<br><br>C3 = -4.9742 MPa                                                                                                                     | Wang et al. <sup>24</sup>              |

|               |                   |                                                      |                           |
|---------------|-------------------|------------------------------------------------------|---------------------------|
| Border Tissue | Isotropic elastic | Elastic modulus = 10.79MPa<br>Poisson's ratio = 0.49 | Chan et al. <sup>70</sup> |
|---------------|-------------------|------------------------------------------------------|---------------------------|

662

663

## 664 References

665

- 666 1. Abegão Pinto L, Willekens K, Van Keer K, et al. Ocular blood flow in  
667 glaucoma – the Leuven Eye Study. *Acta Ophthalmologica* 2016;94:592-598.
- 668 2. Coudrillier B, Tian J, Alexander S, Myers KM, Quigley HA, Nguyen TD.  
669 Biomechanics of the human posterior sclera: age- and glaucoma-related changes  
670 measured using inflation testing. *Invest Ophthalmol Vis Sci* 2012;53:1714-1728.
- 671 3. Ethier CR. Scleral biomechanics and glaucoma—a connection? *Canadian*  
672 *Journal of Ophthalmology / Journal Canadien d'Ophthalmologie* 2006;41:9-14.
- 673 4. Girard MJ, Strouthidis NG, Desjardins A, Mari JM, Ethier CR. In vivo optic  
674 nerve head biomechanics: performance testing of a three-dimensional tracking  
675 algorithm. *Journal of the Royal Society, Interface* 2013;10:20130459.
- 676 5. Burgoyne CF, Downs JC, Bellezza AJ, Suh JK, Hart RT. The optic nerve head  
677 as a biomechanical structure: a new paradigm for understanding the role of IOP-  
678 related stress and strain in the pathophysiology of glaucomatous optic nerve head  
679 damage. *Progress in retinal and eye research* 2005;24:39-73.
- 680 6. Downs JC. Optic nerve head biomechanics in aging and disease.  
681 *Experimental eye research* 2015;133:19-29.
- 682 7. Downs JC, Roberts MD, Burgoyne CF. The Mechanical Environment of the  
683 Optic Nerve Head in Glaucoma. *Optometry and vision science : official publication of*  
684 *the American Academy of Optometry* 2008;85:425-435.
- 685 8. Girard MJ, Suh JK, Bottlang M, Burgoyne CF, Downs JC. Biomechanical  
686 changes in the sclera of monkey eyes exposed to chronic IOP elevations. *Invest*  
687 *Ophthalmol Vis Sci* 2011;52:5656-5669.
- 688 9. Sigal IA, Flanagan JG, Tertinegg I, Ethier CR. Predicted extension,  
689 compression and shearing of optic nerve head tissues. *Exp Eye Res* 2007;85:312-  
690 322.
- 691 10. Wang X, Beotra MR, Tun TA, et al. In Vivo 3-Dimensional Strain Mapping  
692 Confirms Large Optic Nerve Head Deformations Following Horizontal Eye  
693 Movements. *Investigative Ophthalmology & Visual Science* 2016;57:5825-5833.
- 694 11. Jonas JB, Wang N, Yang D, Ritch R, Panda-Jonas S. Facts and myths of  
695 cerebrospinal fluid pressure for the physiology of the eye. *Progress in retinal and eye*  
696 *research* 2015;46:67-83.
- 697 12. Wang X, Fisher LK, Milea D, Jonas JB, Girard MJ. Predictions of Optic Nerve  
698 Traction Forces and Peripapillary Tissue Stresses Following Horizontal Eye  
699 Movements. *Invest Ophthalmol Vis Sci* 2017;58:2044-2053.
- 700 13. Girard MJ, Beotra MR, Chin KS, et al. In Vivo 3-Dimensional Strain Mapping  
701 of the Optic Nerve Head Following Intraocular Pressure Lowering by Trabeculectomy.  
702 *Ophthalmology* 2016;123:1190-1200.
- 703 14. Agoumi Y, Sharpe GP, Hutchison DM, Nicoleta MT, Artes PH, Chauhan BC.  
704 Lamellar and prelaminar tissue displacement during intraocular pressure elevation in  
705 glaucoma patients and healthy controls. *Ophthalmology* 2011;118:52-59.
- 706 15. Fazio MA, Johnstone JK, Smith B, Wang L, Girkin CA. Displacement of the  
707 Lamina Cribrosa in Response to Acute Intraocular Pressure Elevation in Normal

- 708 Individuals of African and European Descent. *Invest Ophthalmol Vis Sci*  
709 2016;57:3331-3339.
- 710 16. Girard MJ, Tun TA, Husain R, et al. Lamina cribrosa visibility using optical  
711 coherence tomography: comparison of devices and effects of image enhancement  
712 techniques. *Invest Ophthalmol Vis Sci* 2015;56:865-874.
- 713 17. Motschmann M, Muller C, Kuchenbecker J, et al. Ophthalmodynamometry: a  
714 reliable method for measuring intracranial pressure. *Strabismus* 2001;9:13-16.
- 715 18. Dragostinoff N, Werkmeister RM, Klaizer J, Groschl M, Schmetterer L. Time  
716 course and topographic distribution of ocular fundus pulsation measured by low-  
717 coherence tissue interferometry. *J Biomed Opt* 2013;18:121502.
- 718 19. Jin Y, Wang X, Zhang L, et al. Modeling the Origin of the Ocular Pulse and Its  
719 Impact on the Optic Nerve Head Modeling the Origin of the Ocular Pulse.  
720 *Investigative Ophthalmology & Visual Science* 2018;59:3997-4010.
- 721 20. Palko JR, Pan X, Liu J. Dynamic testing of regional viscoelastic behavior of  
722 canine sclera. *Exp Eye Res* 2011;93:825-832.
- 723 21. Pavlatos E, Ma Y, Clayson K, Pan X, Liu J. Regional deformation of the optic  
724 nerve head and peripapillary sclera during IOP elevation. *Investigative*  
725 *ophthalmology & visual science* 2018;59:3779-3788.
- 726 22. Kiss B, Dallinger S, Polak K, Findl O, Eichler HG, Schmetterer L. Ocular  
727 hemodynamics during isometric exercise. *Microvasc Res* 2001;61:1-13.
- 728 23. Trew DR, James CB, Thomas SHL, Sutton R, Smith SE. Factors influencing  
729 the ocular pulse — the heart rate. *Graefe's Archive for Clinical and Experimental*  
730 *Ophthalmology* 1991;229:553-556.
- 731 24. Wang X, Rumpel H, Lim WE, et al. Finite Element Analysis Predicts Large  
732 Optic Nerve Head Strains During Horizontal Eye Movements. *Invest Ophthalmol Vis*  
733 *Sci* 2016;57:2452-2462.
- 734 25. Girard MJ, Suh JK, Bottlang M, Burgoyne CF, Downs JC. Scleral  
735 biomechanics in the aging monkey eye. *Invest Ophthalmol Vis Sci* 2009;50:5226-  
736 5237.
- 737 26. Sigal IA, Flanagan JG, Ethier CR. Factors influencing optic nerve head  
738 biomechanics. *Invest Ophthalmol Vis Sci* 2005;46:4189-4199.
- 739 27. Downs JC, Suh JK, Thomas KA, Bellezza AJ, Hart RT, Burgoyne CF.  
740 Viscoelastic material properties of the peripapillary sclera in normal and early-  
741 glaucoma monkey eyes. *Invest Ophthalmol Vis Sci* 2005;46:540-546.
- 742 28. Downs JC, Suh JK, Thomas KA, Bellezza AJ, Burgoyne CF, Hart RT.  
743 Viscoelastic characterization of peripapillary sclera: material properties by quadrant  
744 in rabbit and monkey eyes. *J Biomech Eng* 2003;125:124-131.
- 745 29. Linden C, Qvarlander S, Johannesson G, et al. Normal-Tension Glaucoma  
746 Has Normal Intracranial Pressure: A Prospective Study of Intracranial Pressure and  
747 Intraocular Pressure in Different Body Positions. *Ophthalmology* 2017.
- 748 30. Hayreh SS, Edwards J. Ophthalmic arterial and venous pressures. Effects of  
749 acute intracranial hypertension. *The British journal of ophthalmology* 1971;55:649-  
750 663.
- 751 31. Ethier CR, Johnson M, Ruberti J. Ocular biomechanics and biotransport.  
752 *Annual review of biomedical engineering* 2004;6:249-273.
- 753 32. Maas SA, Ellis BJ, Ateshian GA, Weiss JA. FEBio: Finite Elements for  
754 Biomechanics. *Journal of Biomechanical Engineering* 2012;134:11005.
- 755 33. Fung YC. *Biomechanics: Mechanical Properties of Living Tissues*: Springer  
756 New York; 2013.

- 757 34. Read S, Collins M. The short-term influence of exercise on axial length and  
758 intraocular pressure. *Eye* 2011;25:767.
- 759 35. Lovasik JV, Kergoat H. Consequences of an increase in the ocular perfusion  
760 pressure on the pulsatile ocular blood flow. *Optom Vis Sci* 2004;81:692-698.
- 761 36. Price EL, Gray LS, Humphries L, Zweig C, Button NF. Effect of exercise on  
762 intraocular pressure and pulsatile ocular blood flow in a young normal population.  
763 *Optom Vis Sci* 2003;80:460-466.
- 764 37. Miyai N, Arita M, Miyashita K, Morioka I, Shiraishi T, Nishio I. Blood pressure  
765 response to heart rate during exercise test and risk of future hypertension.  
766 *Hypertension* 2002;39:761-766.
- 767 38. Boyce B, Jones R, Nguyen T, Grazier J. Stress-controlled viscoelastic tensile  
768 response of bovine cornea. *Journal of biomechanics* 2007;40:2367-2376.
- 769 39. Elsheikh A, Wang D, Brown M, Rama P, Campanelli M, Pye D. Assessment  
770 of corneal biomechanical properties and their variation with age. *Current eye*  
771 *research* 2007;32:11-19.
- 772 40. Race A, Broom ND, Robertson P. Effect of loading rate and hydration on the  
773 mechanical properties of the disc. *Spine* 2000;25:662-669.
- 774 41. Tirella A, Mattei G, Ahluwalia A. Strain rate viscoelastic analysis of soft and  
775 highly hydrated biomaterials. *Journal of biomedical materials research Part A*  
776 2014;102:3352-3360.
- 777 42. Kling S, Bekesi N, Dorronsoro C, Pascual D, Marcos S. Corneal viscoelastic  
778 properties from finite-element analysis of in vivo air-puff deformation. *PloS one*  
779 2014;9:e104904.
- 780 43. Tan NY, Koh V, Girard MJ, Cheng CY. Imaging of the lamina cribrosa and its  
781 role in glaucoma: a review. *Clinical & experimental ophthalmology* 2018;46:177-188.
- 782 44. Cheng L, Ding Y, Duan X, Wu Z. Ocular pulse amplitude in different types of  
783 glaucoma using dynamic contour tonometry: Diagnosis and follow-up of glaucoma.  
784 *Experimental and Therapeutic Medicine* 2017;14:4148-4152.
- 785 45. Chauhan BC, Danthurebandara VM, Sharpe GP, et al. Bruch's Membrane  
786 Opening Minimum Rim Width and Retinal Nerve Fiber Layer Thickness in a Normal  
787 White Population: A Multicenter Study. *Ophthalmology* 2015;122:1786-1794.
- 788 46. Chauhan BC, O'Leary N, Almobarak FA, et al. Enhanced detection of open-  
789 angle glaucoma with an anatomically accurate optical coherence tomography-  
790 derived neuroretinal rim parameter. *Ophthalmology* 2013;120:535-543.
- 791 47. Tun TA, Sun CH, Baskaran M, et al. Determinants of optical coherence  
792 tomography-derived minimum neuroretinal rim width in a normal Chinese population.  
793 *Invest Ophthalmol Vis Sci* 2015;56:3337-3344.
- 794 48. Gmeiner JM, Schrems WA, Mardin CY, Laemmer R, Kruse FE, Schrems-  
795 Hoesl LM. Comparison of Bruch's membrane opening minimum rim width and  
796 peripapillary retinal nerve fiber layer thickness in early glaucoma assessment.  
797 *Investigative Ophthalmology & visual science* 2016;57:OCT575-OCT584.
- 798 49. Danthurebandara VM, Sharpe GP, Hutchison DM, et al. Enhanced structure-  
799 function relationship in glaucoma with an anatomically and geometrically accurate  
800 neuroretinal rim measurement. *Investigative ophthalmology & visual science*  
801 2015;56:98-105.
- 802 50. Fortune B, Yang H, Strouthidis NG, et al. The effect of acute intraocular  
803 pressure elevation on peripapillary retinal thickness, retinal nerve fiber layer  
804 thickness, and retardance. *Invest Ophthalmol Vis Sci* 2009;50:4719-4726.
- 805 51. Braunsmann C, Hammer CM, Rheinlaender J, Kruse FE, Schäffer TE,  
806 Schlötzer-Schrehardt U. Evaluation of lamina cribrosa and peripapillary sclera

- 807 stiffness in pseudoexfoliation and normal eyes by atomic force microscopy.  
808 *Investigative ophthalmology & visual science* 2012;53:2960-2967.
- 809 52. Wostyn P, De Groot V, Audenaert K, De Deyn PP. Are intracranial pressure  
810 fluctuations important in glaucoma? *Medical hypotheses* 2011;77:598-600.
- 811 53. McMonnies CW. The interaction between intracranial pressure, intraocular  
812 pressure and lamina cribrosa compression in glaucoma. *Clinical & experimental*  
813 *optometry* 2016;99:219-226.
- 814 54. Edwards ME, Wang SS, Good TA. Role of viscoelastic properties of  
815 differentiated SH-SY5Y human neuroblastoma cells in cyclic shear stress injury.  
816 *Biotechnology progress* 2001;17:760-767.
- 817 55. Grytz R, Girkin CA, Libertiaux V, Downs JC. Perspectives on biomechanical  
818 growth and remodeling mechanisms in glaucoma. *Mechanics research*  
819 *communications* 2012;42:92-106.
- 820 56. Liu B, McNally S, Kilpatrick JI, Jarvis SP, O'Brien CJ. Aging and ocular tissue  
821 stiffness in glaucoma. *Survey of ophthalmology* 2018;63:56-74.
- 822 57. Albon J, Purslow PP, Karwatowski WS, Easty DL. Age related compliance of  
823 the lamina cribrosa in human eyes. *British Journal of Ophthalmology* 2000;84:318-  
824 323.
- 825 58. Coudrillier B, Boote C, Quigley HA, Nguyen TD. Scleral anisotropy and its  
826 effects on the mechanical response of the optic nerve head. *Biomechanics and*  
827 *modeling in mechanobiology* 2013;12:941-963.
- 828 59. Coudrillier B, Campbell IC, Read AT, et al. Effects of Peripapillary Scleral  
829 Stiffening on the Deformation of the Lamina Cribrosa. *Investigative Ophthalmology &*  
830 *Visual Science* 2016;57:2666-2677.
- 831 60. Hayreh SS. Posterior ciliary artery circulation in health and disease: the  
832 Weisenfeld lecture. *Invest Ophthalmol Vis Sci* 2004;45:749-757; 748.
- 833 61. Polska E, Simader C, Weigert G, et al. Regulation of choroidal blood flow  
834 during combined changes in intraocular pressure and arterial blood pressure. *Invest*  
835 *Ophthalmol Vis Sci* 2007;48:3768-3774.
- 836 62. Morgan WH, Hazelton ML, Yu D-Y. Retinal venous pulsation: Expanding our  
837 understanding and use of this enigmatic phenomenon. *Progress in retinal and eye*  
838 *research* 2016;55:82-107.
- 839 63. Morgan WH, Lind CRP, Kain S, Fatehee N, Bala A, Yu D-Y. Retinal Vein  
840 Pulsation Is in Phase with Intracranial Pressure and Not Intraocular Pressure.  
841 *Investigative Ophthalmology & Visual Science* 2012;53:4676-4681.
- 842 64. Roberts MD, Grau V, Grimm J, et al. Remodeling of the connective tissue  
843 microarchitecture of the lamina cribrosa in early experimental glaucoma.  
844 *Investigative ophthalmology & visual science* 2009;50:681-690.
- 845 65. Downs J, Roberts M, Burgoyne C, Hart R. Finite element modeling of the  
846 lamina cribrosa microstructure in normal and early glaucoma monkey eyes.  
847 *Investigative Ophthalmology & Visual Science* 2007;48:3301-3301.
- 848 66. Wang YX, Zhang Q, Yang H, Chen JD, Wang N, Jonas JB. Lamina cribrosa  
849 pore movement during acute intraocular pressure rise. *British Journal of*  
850 *Ophthalmology* 2019;bjophthalmol-2019-314016.
- 851 67. Zhang Q, Xu L, Wei WB, Wang YX, Jonas JB. Size and Shape of Bruch's  
852 Membrane Opening in Relationship to Axial Length, Gamma Zone, and Macular  
853 Bruch's Membrane Defects. *Investigative Ophthalmology & Visual Science*  
854 2019;60:2591-2598.



- 855 68. Sigal IA, Grimm JL, Jan NJ, Reid K, Minckler DS, Brown DJ. Eye-specific  
856 IOP-induced displacements and deformations of human lamina cribrosa. *Invest*  
857 *Ophthalmol Vis Sci* 2014;55:1-15.
- 858 69. Miller K. Constitutive model of brain tissue suitable for finite element analysis  
859 of surgical procedures. *Journal of biomechanics* 1999;32:531-537.
- 860 70. Chan WH, Hussain AA, Marshall J. Youngs Modulus of Bruchs Membrane:  
861 Implications for AMD. *Investigative Ophthalmology & Visual Science* 2007;48:2187-  
862 2187.  
863
